# Supplementary material for: Discovery of a hidden form of neuropeptide F and its presence throughout the CNS–gut axis in the mud crab, Scylla olivacea
Source: Frontiers journal article supplement (doi:10.3389/fmars.2022.951648), 2022-08-15
Supplement: Data_Sheet_1.pdf [file Data_Sheet_1.pdf]

# Discovery of a hidden form of neuropeptide F and its presence throughout the CNS-gut axis in the mud crab, *Scylla olivacea*

## Supplement data 1

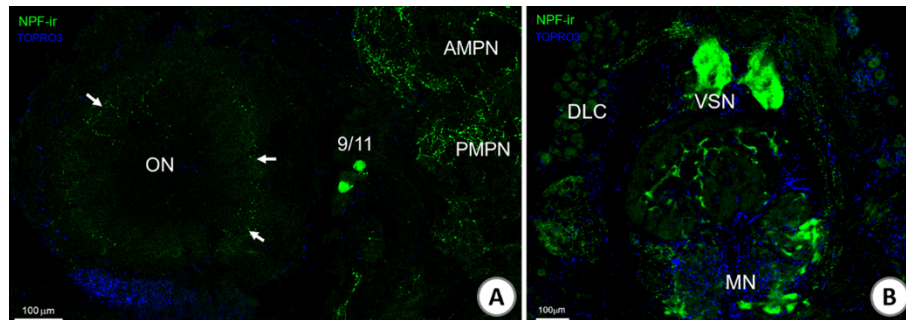

**Supplement data 1.** The fluorescent micrographs of the NPF-ir in the brain and VNC. (A) NPF-ir was predominantly detected in subcap region of the ON (arrows). (B) NPF-ir localized in visceral sensory neuropil (VSN), maxillary neuropils (MN), and the dorsolateral cluster of the VNC.
